# Supplementary material for: Increased Alveolar Epithelial Damage Markers and Inflammasome-Regulated Cytokines Are Associated with Pulmonary Superinfection in ARDS
Source: MDPI journal article supplement (doi:10.3390/jcm12113649), 2023-05-24
Supplement: s1 [file s1]

**Supplementary Table S1. Origin of ARDS in patients with and without pulmonary superinfection**

| Patient | Sex    | Age | Superinfection | Origin of ARDS |
|---------|--------|-----|----------------|----------------|
| 1       | male   | 58  | yes            | viral          |
| 2       | male   | 51  | no             | viral          |
| 3       | male   | 58  | no             | viral          |
| 4       | female | 43  | yes            | viral          |
| 5       | male   | 45  | yes            | viral          |
| 6       | female | 56  | yes            | viral          |
| 7       | female | 77  | yes            | viral          |
| 8       | male   | 70  | yes            | viral          |
| 9       | male   | 63  | yes            | viral          |
| 10      | male   | 26  | yes            | bacterial      |
| 11      | male   | 74  | no             | bacterial      |
| 12      | male   | 63  | yes            | other          |
| 13      | male   | 62  | yes            | bacterial      |
| 14      | male   | 78  | yes            | bacterial      |
| 15      | male   | 56  | yes            | viral          |
| 16      | female | 68  | no             | bacterial      |
| 17      | male   | 43  | no             | non-pulmonary  |
| 18      | female | 40  | no             | non-pulmonary  |
| 19      | male   | 58  | no             | non-pulmonary  |
| 20      | male   | 52  | yes            | non-pulmonary  |
| 21      | male   | 73  | yes            | bacterial      |
| 22      | male   | 69  | no             | bacterial      |
| 23      | male   | 26  | no             | non-pulmonary  |
| 24      | male   | 60  | yes            | bacterial      |
| 25      | male   | 36  | yes            | bacterial      |
| 26      | female | 54  | no             | bacterial      |
| 27      | female | 48  | no             | bacterial      |
| 28      | female | 70  | yes            | bacterial      |
| 29      | male   | 57  | no             | viral          |
| 30      | male   | 53  | no             | viral          |
| 31      | male   | 27  | yes            | viral          |
| 32      | male   | 63  | no             | viral          |
| 33      | male   | 48  | no             | viral          |
| 34      | female | 48  | no             | viral          |
| 35      | male   | 46  | no             | non-pulmonary  |
| 36      | male   | 76  | no             | bacterial      |
| 37      | male   | 51  | no             | non-pulmonary  |
| 38      | male   | 62  | yes            | viral          |
| 39      | female | 55  | yes            | viral          |
| 40      | male   | 69  | yes            | viral          |
| 41      | female | 33  | yes            | viral          |
| 42      | female | 45  | yes            | viral          |
| 43      | female | 69  | yes            | viral          |
| 44      | male   | 44  | no             | bacterial      |
| 45      | male   | 55  | no             | non-pulmonary  |
| 46      | male   | 43  | no             | non-pulmonary  |
| 47      | male   | 55  | no             | non-pulmonary  |
| 48      | male   | 58  | no             | bacterial      |
| 49      | male   | 23  | no             | bacterial      |
| 50      | male   | 34  | no             | bacterial      |
| 51      | male   | 58  | no             | bacterial      |
| 52      | male   | 67  | no             | bacterial      |
